# Supplementary material
Source: HighWire-hosted journal article supplement (https://bmjopen.bmj.com/content/6/8/e011908)
Supplement: inline-supplementary-material-1 [file inline-supplementary-material-1.pdf]

## **Open Interview with Nurses**

### **Main Narration**

#### **Narrative-generating Question**

As you know, I am interested in your experience in connection with synthetic sedatives and hypnotics in **elderly patients**. I know from my own experience that nurses are particularly important in this connection because they are close to the patient and administer the medication. However, we know very little about the experience of nurses in connection with sedatives and hypnotics. It is therefore important to me to understand your perspective on this.

Please try to remember situations where either the patient asked for sedatives or hypnotics or where you administered sedatives or hypnotics.

Please take your time to recall the situations. It would be helpful if you could describe some details. I am going to simply listen and take notes and refer back to them at some later time.

### **Questioning Phase**

#### **Alternative Treatment Options**

Instead of using sedatives and hypnotics, alternative and complementary treatment options are available.

Which alternative treatment options do you prefer in your routines, and why?

Can you tell me about a positive or negative experience in connection with alternative treatment options?

#### **Nurse-Patient Relationship**

How does the behaviour and personality of a patient (or the nurse-patient relationship) influence the treatment with sedatives and hypnotics?

There may have been a situation when you felt you were influenced by the patient. Please tell me about this.

#### **Treatment of Sedatives and Hypnotics in Interdisciplinary Teams**

Please tell me about the procedures followed for prescriptions of sedatives and hypnotics when the patient demands them or the doctor orders them. Can you describe how you handle dispensing and prescription of sedatives or hypnotics in the nursing team?

#### **Knowledge of Nurses about Effects and Side Effects of Sedatives or Hypnotics**

How confident are you about dispensing sedatives or hypnotics?

**Need for Improvement**

Which needs for improvement do you see in connection with prescribing sedatives or hypnotics?

**Conclusion of Interview**

Is there anything you would like to add to our conversation so far in connection with sedatives and hypnotics?
